# Supplementary figures and images for: PRDM16-DT: A Brain and Astrocyte-Specific lncRNA Implicated in Alzheimer’s Disease
Source: PubMed Central journal article supplement — bioRxiv. 2024 Jul 1:2024.06.27.600964. Preprint. [Version 1] doi: 10.1101/2024.06.27.600964 (PMC11244882; doi:10.1101/2024.06.27.600964), 2024-07-01

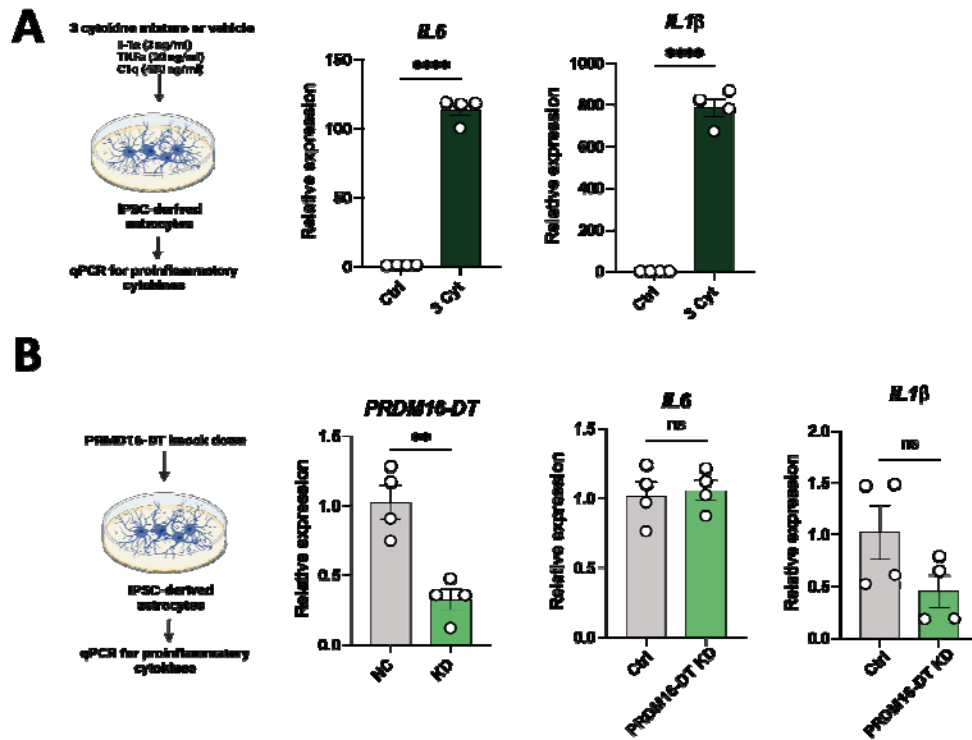

Fig S1.

Supplement: NIHPP2024.06.27.600964v1-supplement-2.pdf [file NIHPP2024.06.27.600964v1-supplement-2.pdf]
